# Supplementary material for: Kompetenzfacetten kindheitspädagogischer Fachkräfte
Source: Atypon-hosted journal article supplement (doi:10.1026/2191-9186/a000641), 2023-12-15
Supplement: 2191-9186_a000641_esm1.pdf [file 2191-9186_a000641_esm1.pdf]

## Elektronisches Supplement (ESM 1)

### Deskriptive Kennwerte und Ergebnisse der statistischen Analysen

Tabelle E1. Häufigkeiten des Ausbildungsniveaus

| Ausbildungsniveau                                                                                  | Kodiert<br>(Rangskala) | Häufigkeit | Prozent |
|----------------------------------------------------------------------------------------------------|------------------------|------------|---------|
| Im Ausbildung (Erzieherin) Fachschule                                                              | 1                      | 17         | 14.2    |
| Im Studium (Kindheitspädagogik) Hochschule                                                         | 2                      | 7          | 5.8     |
| Ausbildung (Erzieherin) Fachschule abgeschlossen                                                   | 3                      | 69         | 57.5    |
| Studium (unspezifisch) abgeschlossen                                                               | 4                      | 10         | 8.3     |
| Studium (Kindheitspädagogik) abgeschlossen                                                         | 5                      | 8          | 6.7     |
| Ausbildung (Erzieherin) Fachschule abgeschlossen<br>und im Studium (unspezifisch)                  | 6                      | 1          | .8      |
| Ausbildung (Erzieherin) Fachschule abgeschlossen<br>und Studium (unspezifisch) abgeschlossen       | 7                      | 4          | 3.3     |
| Ausbildung (Erzieherin) Fachschule abgeschlossen<br>und Studium (Kindheitspädagogik) abgeschlossen | 8                      | 4          | 3.3     |
| Summe                                                                                              |                        | 120        | 100     |

Tabelle E2. Mittelwerte und Standardabweichungen für die Indikatoren der professionellen Wahrnehmung: Lautes Denken

| Lautes Denken            |             |
|--------------------------|-------------|
| Emotionale Unterstützung | 1.93 (0.70) |
| Organisation KiTa-Alltag | 2.82 (1.11) |
| Lernunterstützung        | 2.60 (0.86) |

*Anmerkungen.* *M* (*SD* in Klammern); 0 = keine Nennung, 8 = höchste Ausprägung.

Tabelle E3. Deskriptive Maße (mittlere absolute Distanzen) für die Indikatoren der professionellen Wahrnehmung: Fragebogen

|                          | Distanzmaße |
|--------------------------|-------------|
| Emotionale Unterstützung | 1.50 (0.84) |
| Organisation KiTa-Alltag | 1.56 (0.76) |
| Lernunterstützung        | 1.21 (0.74) |

*Anmerkungen.*  $M$  ( $SD$  in Klammern); höhere Werte bedeuten größere Abweichungen vom Experten-Mittelwert.

Tabelle E4. Regressionskoeffizienten der Messmodelle für die Konstrukte der professionellen Wahrnehmung

|                          | <i>B</i> | <i>SE (B)</i> | $\beta$ | <i>p</i> |
|--------------------------|----------|---------------|---------|----------|
| Lautes Denken            |          |               |         |          |
| Emotionale Unterstützung | 0.55     | 0.11          | 0.59    | < .001   |
| Organisation KiTa-Alltag | 1.00     |               | 0.85    | < .001   |
| Lernunterstützung        | 0.72     | 0.14          | 0.66    | < .001   |
| Fragebogen (Distanzmaß)  |          |               |         |          |
| Emotionale Unterstützung | 1.09     | 0.17          | .74     | < .001   |
| Organisation KiTa-Alltag | 1.00     |               | .71     | < .001   |
| Lernunterstützung        | 1.02     | 0.16          | .81     | < .001   |

Tabelle E5. Mittelwerte und Standardabweichungen für die Dimensionen der Lernunterstützung

| Domäne                     | Dimensionen                    | <i>M (SD)</i> |
|----------------------------|--------------------------------|---------------|
| Lernunterstützung          | Kognitive Aktivierung          | 2.12 (1.04)   |
|                            | Feedbackqualität               | 2.65 (1.06)   |
|                            | Förderung sprachlichen Lernens | 3.10 (1.10)   |
| Lernunterstützung (global) |                                | 2.62 (0.95)   |

*Anmerkungen.* 1 = niedrigste Ausprägung, 7 = höchste Ausprägung.

Tabelle E6. Regressionskoeffizienten des Messmodells für die CLASS-Domäne der Lernunterstützung

|                                    | <i>B</i> | <i>SE (B)</i> | $\beta$ | <i>p</i> |
|------------------------------------|----------|---------------|---------|----------|
| Lernunterstützung                  |          |               |         |          |
| Kognitive Aktivierung              | 1.01     | 0.11          | 0.79    | < .001   |
| Feedbackqualität                   | 1.30     | 0.13          | 1.00    | < .001   |
| Unterstützung sprachlichen Lernens | 1.00     |               | 0.74    | < .001   |

Tabelle E7. Interkorrelation der Indikatoren

|                     | Ausbild | Beruf  | Wissen | Wissor | PW Lautes Denken |       |       | PW Fragebogen |        |      | CLASS |       |
|---------------------|---------|--------|--------|--------|------------------|-------|-------|---------------|--------|------|-------|-------|
|                     |         |        |        |        | EU               | OK    | LU    | EU            | OK     | LU   | SL    | KA    |
| Beruf               | .26**   |        |        |        |                  |       |       |               |        |      |       |       |
| Wissen              | .25**   | -.04   |        |        |                  |       |       |               |        |      |       |       |
| Wissor              | .28**   | .00    | .33**  |        |                  |       |       |               |        |      |       |       |
| PW Lautes Denken EU | .03     | .06    | .05    | .14    |                  |       |       |               |        |      |       |       |
| PW Lautes Denken OK | .16     | .13    | -.02   | .06    | .50**            |       |       |               |        |      |       |       |
| PW Lautes Denken LU | .104    | .15    | .03    | .08    | .37**            | .56** |       |               |        |      |       |       |
| PW Fragebogen EU    | -.07    | -.23*  | -.13   | -.20*  | -.04             | .07   | -.02  |               |        |      |       |       |
| PW Fragebogen OK    | -.03    | -.11   | -.31** | -.21*  | -.04             | .17   | .01   | .53**         |        |      |       |       |
| PW Fragebogen LU    | -.15    | -.24** | -.20*  | -.16   | -.12             | .06   | -.09  | .59**         | .56**  |      |       |       |
| CLASS SL            | .18*    | .24**  | .27**  | .19*   | .23*             | .09   | .23** | -.24**        | -.26** | -.12 |       |       |
| CLASS KA            | .15     | .13    | .22*   | .21*   | .30**            | .28** | .21*  | -.00          | -.06   | -.01 | .57** |       |
| CLASS FB            | .22*    | .18*   | .19*   | .16    | .25**            | .21*  | .24** | -.06          | -.11   | -.04 | .73** | .78** |

Anmerkungen: Ausbild = Ausbildungsniveau, Beruf = Berufserfahrung in Jahren, Wissor = Wissenschaftsorientierung, PW = professionelle Wahrnehmung,

Fragebogen: Distanzmaße, EU = Emotionale Unterstützung, OK = Organisation des KiTa-Alltags, LU = Lernunterstützung,

CLASS SL = Unterstützung sprachlichen Lernens in der CLASS -PreK, CLASS KA = kognitive Aktivierung, CLASS FB = Feedbackqualität.

\*  $p < .05$ , \*\*  $p < .01$  (zweiseitige Testung).

Tabellen E8.1. bis E8.3. Ergebnisse der Regressionsanalysen im Gesamtmodell

Tabelle E8.1. Ausbildungsniveau und Wissenschaftsorientierung als Prädiktoren, Wissen und Wissenschaftsorientierung als Kriterien

| Prädiktoren          | Wissen   |               |         |                      | Wissenschaftsorientierung |               |         |                      |
|----------------------|----------|---------------|---------|----------------------|---------------------------|---------------|---------|----------------------|
|                      | <i>B</i> | <i>SE (B)</i> | $\beta$ | <i>P<sup>1</sup></i> | <i>B</i>                  | <i>SE (B)</i> | $\beta$ | <i>p<sup>1</sup></i> |
| Ausbild              | 0.42     | 0.21          | 0.18    | .022                 | 0.71                      | 0.02          | 0.28    | .001                 |
| Wissor               | 2.62     | 0.83          | 0.28    | .001                 |                           |               |         |                      |
| <i>R<sup>2</sup></i> | .14      |               |         |                      | .08                       |               |         |                      |

*Anmerkungen:* *Ausbild* = Ausbildungsniveau, *Wissor* = Wissenschaftsorientierung,

<sup>1</sup>*p*-Werte bei einseitiger Testung aufgrund gerichteter Hypothesen.



Tabelle E8.2. Professionelle Wahrnehmung als Kriterium

| Prädiktoren | Professionelle Wahrnehmung |               |         |       |            |               |         |       |
|-------------|----------------------------|---------------|---------|-------|------------|---------------|---------|-------|
|             | Lautes Denken              |               |         |       | Fragebogen |               |         |       |
|             | <i>B</i>                   | <i>SE (B)</i> | $\beta$ | $p^1$ | <i>B</i>   | <i>SE (B)</i> | $\beta$ | $p^1$ |
| Ausbild     | 0.04                       | 0.01          | 0.13    | .122  | 0.01       | 0.01          | 0.07    | .251  |
| Beruf       | 0.01                       | 0.01          | 0.13    | .098  | - 0.01     | 0.01          | -0.32   | .001  |
| Wissen      | -0.01                      | 0.01          | - .05   | .305  | -0.01      | 0.01          | -.26    | .006  |
| Wissor      | 0.11                       | 0.11          | 0.09    | .203  | -0.08      | 0.04          | -.20    | .024  |
| $R^2$       | .06                        |               |         |       | .24        |               |         |       |

*Anmerkungen:* *Ausbild* = Ausbildungsniveau, *Beruf* = Berufserfahrung in Jahren,

*Fragebogen:* Distanzmaße, *Wissor* = Wissenschaftsorientierung.

<sup>1</sup>*p*-Werte bei einseitiger Testung aufgrund gerichteter Hypothesen.

Tabelle E8.3. Interaktionsqualität als Kriterium

| Prädiktoren      | Interaktionsqualität |               |         |       |                            |               |         |       |
|------------------|----------------------|---------------|---------|-------|----------------------------|---------------|---------|-------|
|                  | Lernunterstützung    |               |         |       | Förderung sprachl. Lernens |               |         |       |
|                  | <i>B</i>             | <i>SE (B)</i> | $\beta$ | $p^1$ | <i>B</i>                   | <i>SE (B)</i> | $\beta$ | $p^1$ |
| Ausbild          | 0.43                 | 0.05          | 0.08    | .196  |                            |               |         |       |
| Beruf            | 0.01                 | 0.01          | 0.13    | .096  |                            |               |         |       |
| Wissen           | 0.04                 | 0.02          | 0.17    | .039  |                            |               |         |       |
| Wissor           | 0.14                 | 0.20          | 0.07    | .251  |                            |               |         |       |
| PW Lautes Denken | 0.44                 | 0.18          | 0.27    | .007  |                            |               |         |       |
| PW Fragebogen    | -0.03                | 0.62          | 0.01    | .479  | -1.61                      | 0.51          | -.22    | .001  |
| $R^2$            | .18                  |               |         |       | .61 <sup>2</sup>           |               |         |       |

*Anmerkungen:* *Ausbild* = Ausbildungsniveau, *Beruf* = Berufserfahrung in Jahren, *Wissor*=  
Wissenschaftsorientierung, *PW* = professionelle Wahrnehmung, *Fragebogen*: Distanzmaße.

<sup>1</sup> *p*-Werte bei einseitiger Testung aufgrund gerichteter Hypothesen.

<sup>2</sup> *Prädiktoren*: Professionelle Wahrnehmung im Fragebogen und latentes Konstrukt  
Lernunterstützung.

Tabelle E9. Ergebnisse der Mediatoranalysen (spezifische indirekte Effekte IE)

| Indirekte Effekte IE | Prädiktoren |        | Mediatoren |                  | Kriterium                  | B    | Konfidenz <sup>a</sup> |      | <i>p</i> <sup>1</sup> |
|----------------------|-------------|--------|------------|------------------|----------------------------|------|------------------------|------|-----------------------|
|                      |             |        |            |                  |                            |      | unter                  | ober |                       |
| IE 1                 | Ausbild     |        | Wissen     |                  | Lernunterstützung          | 0.16 | 0.01                   | 0.05 | .090                  |
| IE 2                 | Ausbild     |        | Wissen     | PW Fragebogen    | Förderung sprachl.Lernens  | 0.01 | 0.01                   | 0.02 | .042                  |
| IE 3                 | Ausbild     | Wissor | Wissen     |                  | Lernunterstützung          | 0.01 | 0.01                   | 0.02 | .046                  |
| IE 4                 | Ausbild     | Wissor | Wissen     | PW Fragebogen    | Förderung sprachl. Lernens | 0.01 | 0.01                   | 0.01 | .008                  |
| IE 5                 | Ausbild     | Wissor |            | PW Fragebogen    | Förderung sprachl. Lernens | 0.01 | 0,01                   | 0.03 | .030                  |
| IE 6                 | Beruf       |        |            | PW Lautes Denken | Förderung sprachl.Lernens  | 0.01 | 0.01                   | 0.01 | .003                  |

*Anmerkungen:* *Ausbild* = Ausbildungsniveau, *Beruf* = Berufserfahrung in Jahren, *Wissor* = Wissenschaftsorientierung, *PW* = professionelle Wahrnehmung, Fragebogen: Distanzmaße.

<sup>a</sup> 90-prozentiges Konfidenzintervall aufgrund gerichteter Hypothesen, unter = untere Grenze, ober = obere Grenze, Bootstrapping-Methode (biaskorrigierte Percentil-Schätzung).

<sup>1</sup> *p*-Werte bei zweiseitiger Testung.
